# Supplementary material for: Single-cell RNA sequencing of the holothurian regenerating intestine reveals the pluripotency of the coelomic epithelium
Source: eLife. 2025 Mar 20;13:RP100796. doi: 10.7554/eLife.100796 (PMC11925454; doi:10.7554/eLife.100796)
Supplement: Figure 1—source data 1. [file elife-100796-fig1-data1.xlsx]

## Sheet: Sheet1
Figure 1—figure supplement 4. Antibody/Markers used for immune- and cytochemical labeling of dissociated cell suspension.
Antibody/Marker	Labeling	Product No.	Reference
Ab Sph AA12	Coelomocyte	-	Ramírez-Gómez et al., 2010
Ab RN1	Neuronal	-	Nieves-Ríos et al., 2020
Ab GFS	Neuronal	-	Diaz-Balzac et al., 2007
Ab KL14	Mesenchyme	-	In preparation
Ab MESO	Mesothelial cells	-	García-Arrarás et al., 2011
Ab HgM2	Muscle	-	In preparation
Ab beta tubulin	Neuronal/Cilia	Sigma T5293	Tossas et al., 2014
Ab Acetylated tubulin	Cellular	Sigma T6793	Tossas et al., 2014
Ab alpha tubulin	Cellular	Sigma T5168	Tossas et al., 2014
Fluorescent Phalloidin	Muscle fibers	Sigma P1951	García-Arrarás et al., 2011; Murray and García-Arrarás et al., 2004
Toluidine Blue	Cell granular content	Sigma T3260	San Miguel-Ruiz & Garcia-Arraras, 2007
