# Supplementary material for: Single-cell RNA sequencing of the holothurian regenerating intestine reveals the pluripotency of the coelomic epithelium
Source: eLife. 2025 Mar 20;13:RP100796. doi: 10.7554/eLife.100796 (PMC11925454; doi:10.7554/eLife.100796)
Supplement: Figure 2—source data 1. [file elife-100796-fig2-data1.xlsx]

## Sheet: Sheet1
Figure 2—figure supplement 4. General statistics of scRNA-seq data after mapping with Cell Ranger.
Description	Mesentery 1	Mesentery 2	Anlage 1	Anlage 2
Estimated Number of Cells	903	549	1388	1004
Number of Reads	86939451	120621009	52320210	151638195
Mean Reads per Cell	96278	237925	37695	151034
Median Genes per Cell	725	687	643	752
Total Genes Detected	20193	18707	19612	20436
